## Subject Index

- Adrenals**  
absence of sex vesicles consistent with XY sex chromosome makeup: HOGG & MCLAREN 327
- Amino acid**  
lethality of tritiated leucine in early mouse embryos: WIEBOLD & ANDERSON 209
- Amphibia**  
embryo  
pigment granule accumulation around nuclei: KOBAYAKAWA 293
- Antigen**  
on cell surface in mouse embryo may be oviductal factor: GAUNT 55
- Antigens**  
to study visceral endoderm differentiation from EC cells: SATO, OZAWA, HAMADA, KASAI, TOKUNAGA & MURAMATSU 165
- Autoradiography**  
of RNA synthesis in oogenesis of polychaete: EMANUELSSON 249
- Avian**  
embryo  
origin of irideal striated muscle: NAKANO & NAKAMURA 1
- Blastocyst**  
mouse  
regeneration of endoderm from primitive ectoderm: GARDNER 303
- Blastomeres**  
*Xenopus laevis*  
pattern specification in blastomere pairs: COOKE & WEBBER 85
- Brain**  
tube closure in rat embryos: MORRISS-KAY & TUCKETT 333
- Carcinoma cells**  
embryonal – visceral endoderm differentiation: SATO, OZAWA, HAMADA, KASAI, TOKUNAGA & MURAMATSU 165
- Cartilage**  
fate of larval chondrocytes during metamorphosis of epibranchial: ALBERCH, LEWBART & GALE 71
- Catalase**  
in liver peroxisomes in foetal and newborn rat: STEFANINI, FARRACE & ARGENTO 151
- Cell proliferation**  
in scleral ectomesenchyme in chick embryos: VAN DE KAMP 25
- Cell surface**  
antigens to study visceral endoderm differentiation from EC cells: SATO, OZAWA, HAMADA, KASAI, TOKUNAGA & MURAMATSU 165  
determinant in *Dictyostelium discoideum*: KREFFT, VOET, GREGG & WILLIAMS 15
- Chick**  
chimaera  
with quail used to study origin of irideal striated muscle: NAKANO & NAKAMURA 1  
embryo  
cell proliferation in condensing scleral ectomesenchyme: VAN DE KAMP 25  
fluid transport across epiblast: STERN, MANNING & GILLESPIE 365
- Chimaera**  
chick-quail used to investigate origin of irideal striated muscle: NAKANO & NAKAMURA 1  
mouse  
detection and analysis of spatial pattern: SCHMIDT, WILKINSON & PONDER 219
- Chondrocytes**  
fate during metamorphosis of salamander epibranchials: ALBERCH, LEWBART & GALE 71
- Clonal analysis**  
of X-chromosome inactivation and origin of germ line in mouse: GARDNER, LYON, EVANS & BURTEISHAW 349
- Colchicine**  
effect on ontogenesis of cranial neuromeres in rat embryo: TUCKETT & MORRISS-KAY 231
- Conjunctival papillae**  
cell proliferation in condensing scleral ectomesenchyme in chick: VAN DE KAMP 25
- Cranial development**  
role of microfilaments and effects of cytochalasin D: MORRISS-KAY & TUCKETT 333
- Cranial neuromeres**  
ontogenesis in rat embryo: TUCKETT & MORRISS-KAY 231

**Culture**

neuropore closure and spinal neural tube  
defects in rat embryo: COPP 39

**Curly tail**

in rat – neuropore closure and neural tube  
defects: COPP 39

**Cytochalasin D**

effect on ontogenesis of cranial  
neuromeres in rat embryo: TUCKETT &  
MORRIS-KAY 231  
role of microfilaments in rat cranial  
neurulation: MORRIS-KAY & TUCKETT 333

**Cytochemistry**

of catalase and D-aminoacid oxidase:  
STEFANINI, FARRACE & ARGENTO 151

**Cytoplasmic flow**

directional – during accumulation of  
pigment granules in *Anura*:  
KOBAYAKAWA 293

**D-aminoacid oxidase**

in liver peroxisomes in foetal and newborn  
rat: STEFANINI, FARRACE & ARGENTO 151

**Dark-field illumination**

to study pigment granule accumulation  
around *Anuran* nuclei:  
KOBAYAKAWA 293

**Descendent clones**

in mouse chimaeric tissues: SCHMIDT,  
WILKINSON & PONDER 219

**Dictyostelium discoideum**

monoclonal antibody used to distinguish  
prespore and prestalk cells: KREFFT, VOET,  
GREGG & WILLIAMS 15

**Dolichos biflorus agglutinin**

used to detect spatial pattern in chimaeric  
tissues: SCHMIDT, WILKINSON &  
PONDER 219

**Dorsal lip**

excision and u.v. irradiation in *Xenopus*  
*laevis*: COOKE 135

**Ectomesenchyme**

cell proliferation associated with  
conjunctival papillae in chick: VAN DE  
KAMP 265

**Egg***Xenopus laevis*

pattern specification in lateral halves:  
COOKE & WEBBER 85  
pattern specification in lateral halves:  
COOKE & WEBBER 113

**Embryonal carcinoma cells**

visceral endoderm differentiation: SATO,  
OZAWA, HAMADA, KASAI, TOKUNAGA &  
MURAMATSU 165

**Endoderm**

regeneration from primitive ectoderm in  
mouse: GARDNER 303

**Epiblast**

fluid transport in early chick embryo:  
STERN, MANNING & GILLESPIE 365

**Epibranchial**

fate of larval chondrocytes in the  
salamander: ALBERCH, LEWBART & GALE 71

**Epithelium**

influence on palate shelf reorientation:  
BULLEIT & ZIMMERMAN 265

**Eurycea bislineata**

fate of larval chondrocytes during  
metamorphosis of epibranchial: ALBERCH,  
LEWBART & GALE 71

**Fate mapping**

in *Xenopus laevis* blastomere pairs: COOKE &  
WEBBER 85

**Fluid transport**

across epiblast of early chick embryo:  
STERN, MANNING & GILLESPIE 365

**Gastrulation**

after u.v. irradiation of *Xenopus* egg:  
COOKE 135  
pattern specification in *Xenopus laevis*  
blastomere pairs: COOKE & WEBBER 85  
pattern specification in *Xenopus laevis*  
lateral halves: COOKE & WEBBER 113

**Germ cells**

absence of sex vesicles consistent with XY  
sex chromosome makeup: HOGG &  
MCLAREN 327

**Germ line**

origin in the mouse embryo: GARDNER, LYON,  
EVANS & BURTENSHAW 349

**Grieg-Smith**

analysis of variance applied to mouse  
chimaeric tissues: SCHMIDT, WILKINSON &  
PONDER 219

**Hyla arborea**

pigment accumulation around nuclei:  
KOBAYAKAWA 293

**Immunosurgery**

regeneration of endoderm from primitive  
ectoderm in mouse: GARDNER 303

**Implantation**

of pre- and early-primitive-streak-stage  
mouse embryos: BEDDINGTON 281

**Inactivation**

X-chromosome – and origin of germ line in  
mouse embryo: GARDNER, LYON, EVANS &  
BURTENSHAW 349

**Intestinal crypts**

analysis of spatial pattern in mouse  
chimaeric tissues: SCHMIDT, WILKINSON &  
PONDER 219

**Iris**

origin of striated muscle in birds: NAKANO &  
NAKAMURA 1

**Lateral halves**

*Xenopus laevis*  
pattern specification in isolates: COOKE &  
WEBBER 113

**Lateral line system**

development of supraorbital system in  
*Xenopus laevis* embryos: WINKLBAUER &  
HAUSEN 183  
pattern formation in supraorbital system in  
*Xenopus* embryos: WINKLBAUER &  
HAUSEN 193

**Leucine**

lethality of tritiated leucine in early mouse  
embryos: WIEBOLD & ANDERSON 209

**Liver**

peroxisomes in foetal and newborn rat:  
STEFANINI, FARRACE & ARGENTO 151

**Meiosis**

absence of sex vesicles consistent with XY  
sex chromosome makeup: HOGG &  
MCLAREN 327

**Metamorphosis**

of epibranchial in salamander: ALBERCH,  
LEWBART & GALE 71

**Microfilaments**

role in cranial neurulation in rat embryos:  
MORRISS-KAY & TUCKETT 333

**Microsurgery**

regeneration of endoderm from primitive  
ectoderm in mouse: GARDNER 303

**Monoclonal antibodies**

recognizing cell surface determinant in  
*Dictyostelium discoideum*: KREFFT, VOET,  
GREGG & WILLIAMS 15

**Mouse**

blastocyst  
regeneration of endoderm from  
primitive ectoderm: GARDNER 303  
chimaera  
detection and analysis of spatial pattern:  
SCHMIDT, WILKINSON & PONDER 219  
embryo  
absence of sex vesicles consistent with  
XY sex chromosome makeup: HOGG &  
MCLAREN 327

clonal analysis of X-chromosome  
inactivation and origin of germ line:  
GARDNER, LYON, EVANS &  
BURTENSCHAW 349

influence of epithelium on palate shelf  
reorientation: BULLEIT & ZIMMERMAN  
265

lethality of a tritiated amino acid:  
WIEBOLD & ANDERSON 209

neuropore closure and spinal neural tube  
defects: COPP 39

teratocarcinoma antigen on cell surface:  
GAUNT 55

transplantation of pre- and early-  
primitive streak stages: BEDDINGTON  
281

**Muscle**

striated  
origin of iris cells in birds: NAKANO &  
NAKAMURA 1

**Mutant**

*curly tail* – neuropore closure and neural  
tube defects in rat: COPP 39

**Neural crest**

origin of striated muscle in birds: NAKANO &  
NAKAMURA 1

**Neural tube**

defects and neuropore closure in rat  
embryos: COPP 39  
ontogenesis in cranium of rat embryo:  
TUCKETT & MORRISS-KAY 231

**Neuromeres**

ontogenesis in cranium of rat embryo:  
TUCKETT & MORRISS-KAY 231

**Neuropore**

closure and spinal neural tube defects in  
rat embryo: COPP 39

**Neurulation**

in rat embryos – effects of cytochalasin D:  
MORRISS-KAY & TUCKETT 333

**Non-equivalence**

in pattern specification in *Xenopus*  
blastomere pairs: COOKE & WEBBER 85  
in pattern specification in *Xenopus*  
lateral halves: COOKE & WEBBER 113

**Nurse cell**

RNA synthesis in polychaete  
*Ophryotrocha*: EMANUELSSON 249

**Ocular development**

cell proliferation in scleral  
ectomesenchyme in chick embryo: VAN  
DE KAMP 265

- Oogenesis**  
 absence of sex vesicles consistent with XY sex chromosome makeup: HOGG & MCLAREN 327  
 RNA synthesis in polychaete  
*Ophryotrocha*: EMANUELSSON 249
- Ophryotrocha labronica***  
 RNA synthesis in oogenesis: EMANUELSSON 249
- Ossicles**  
 scleral – cell proliferation in chick embryo: VAN DE KAMP 265
- Oviduct**  
 mouse  
 factor relation to teratocarcinoma cell surface antigen: GAUNT 55
- Palate**  
 shelf reorientation – influence of epithelium: BULLEIT & ZIMMERMAN 265
- Pattern formation**  
 during development of lateral line system in *Xenopus laevis*: WINKLBAUER & HAUSEN 193
- Pattern specification**  
 in chimaeric mouse tissues: SCHMIDT, WILKINSON & PONDER 219  
 in *Xenopus laevis* blastomere pairs: COOKE & WEBBER 85  
 in *Xenopus laevis* lateral halves: COOKE & WEBBER 113  
 in *Xenopus laevis* after u.v. irradiation of egg: COOKE 135
- Peroxisomes**  
 in foetal and newborn rat liver: STEFANINI, FARRACE & ARGENTO 151
- Pigment accumulation**  
 around nuclei in early embryos of Anura: KOBAYAKAWA 293
- Polychaete**  
 RNA synthesis in oocyte–nurse cell complex: EMANUELSSON 249
- Prespore**  
 cells in *Dictyostelium discoideum* – cell surface determinants: KREFFT, VOET, GREGG & WILLIAMS 15
- Prestalk**  
 cells in *Dictyostelium discoideum* – cell surface determinants: KREFFT, VOET, GREGG & WILLIAMS 15
- Primitive ectoderm**  
 regeneration of endoderm in mouse: GARDNER 303
- Primitive streak stage**  
 mouse embryos – reimplantation and subsequent development: BEDDINGTON 281
- Protein**  
 degradation curves in mouse embryos: WIEBOLD & ANDERSON 209
- Quail**  
 chimaera  
 with chick used to study origin of irideal striated muscle: NAKANO & NAKAMURA 1
- Radiation**  
 lethality of tritiated amino acid in mouse embryos: WIEBOLD & ANDERSON 209
- Rana rugosa***  
 pigment accumulation around nuclei: KOBAYAKAWA 293
- Rat**  
 embryo  
 ontogenesis of cranial neuromeres: TUCKETT & MORRIS-KAY 231  
 role of microfilaments in cranial neurulation: MORRIS-KAY & TUCKETT 333  
 foetus  
 and newborn liver peroxisomes: STEFANINI, FARRACE & ARGENTO 151
- Regeneration**  
 of endoderm from primitive ectoderm in mouse embryo: GARDNER 303
- Reorientation**  
 of palate shelf – influence of epithelium: BULLEIT & ZIMMERMAN 265
- Retinoic acid**  
 sensitivity of visceral endoderm differentiation from EC cells: SATO, OZAWA, HAMADA, KASAI, TOKUNAGA & MURAMATSU 165
- Ribonucleic acid (RNA)**  
 synthesis in oocyte–nurse cell complex in polychaete: EMANUELSSON 249
- Salamander**  
 fate of larval chondrocytes during metamorphosis of epibranchial: ALBERCH, LEWBART & GALE 71
- Scleral ectomesenchyme**  
 cell proliferation in the conjunctival papillae in chick: VAN DE KAMP 265
- Sex vesicles**  
 absence in meiotic foetal germ cells in mice: HOGG & MCLAREN 327

**Sodium transport**

across epiblast of early chick embryo:  
STERN, MANNING & GILLESPIE 365

**Striated muscle**

origin of iris cells in birds: NAKANO &  
NAKAMURA 1

**Supraorbital system**

development in triploid *Xenopus* embryos:  
WINKLBAUER & HAUSEN 183  
pattern formation in *Xenopus* embryos:  
WINKLBAUER & HAUSEN 193

**Teratocarcinoma**

antigen on cell surface may be oviductal  
factor: GAUNT 55

**Thyroxine**

effect on metamorphosis of epibranchial in  
the salamander: ALBERCH, LEWBART &  
GALE 71

**Transplantation**

of pre- and early-primitive-streak-stage  
mouse embryos: BEDDINGTON 281

**Triploidy**

development of lateral line system in  
*Xenopus* triploid embryos: WINKLBAUER &  
HAUSEN 183

**U.v. irradiation**

and dorsal lip excision in *Xenopus laevis*:  
COOKE 135

**Visceral endoderm**

differentiation from embryonal carcinoma  
cells: SATO, OZAWA, HAMADA, KASAI,  
TOKUNAGA & MURAMATSU 165

**X-chromosome**

inactivation and origin of germ line in  
mouse embryo: GARDNER, LYON, EVANS &  
BURTENSCHAW 349

***Xenopus laevis*****egg**

pattern specification in blastomere pairs:  
COOKE & WEBBER 85

pattern specification in lateral halves:  
COOKE & WEBBER 113

u.v. irradiation and pattern specification:  
COOKE 135

**lateral line system**

development of supraorbital system in  
triploid embryos: WINKLBAUER &  
HAUSEN 183

pattern formation in supraorbital system:  
WINKLBAUER & HAUSEN 193

**Yolk granules**

RNA synthesis in polychaete  
*Ophryotrocha*: EMANUELSSON 249
